# Supplementary material
Source: Research Square preprint supplement (doi:10.21203/rs.3.rs-9102938/v1)
Supplement: Supplementary file 1 [file aee0a12118147754ebf0153e.docx]

1. **Materials and methods**

Glucose (CAT. NO. GL 1320), total protein (CAT. NO. TP 2020), total lipids (CAT NO. TL 2010) triglyceride (CAT. NO. TR 2030), aspartate aminotransferase (CAT. NO. AS 1061 (45)), alanine aminotransferase (CAT. NO. AL 1031 (45)), alkaline phosphatase (CAT. NO. AP 1020), butyryl cholinesterase (CAT. NO. CE 1240), urea (CAT. NO. UR 2110), uric acid (CAT. NO. UA 2120), creatinine (CAT. NO. CR 1251) and nitric oxide (CAT NO. 2533) were purchased from Bio diagnostic company (29 Tahreer St., Dokki, Giza, Egypt). Total cholesterol (CAT. NO. 23001), high-density lipoprotein-cholesterol(CAT. NO. 266001), low-density lipoprotein-cholesterolconcentration (CAT. NO. 280001), gamma-glutamyl transferase(CAT. NO. 247001) and albumin (CAT. NO. 210001) were purchased from Spectrum.

- 1. **Gas Chromatography-Mass Spectroscopy Condition**

Gas chromatography–mass spectrometry (GC-MS) 1300 GC Ultra/Mass Spectrophotometer ISQ QD (Thermo Scientific) device with X-calibur 2.2 software. Analysis was performed using helium as the carrier gas at an average velocity of 39 cm/s with a flow rate of 0.7 mL/min. The total run time was 43.67 minutes. The oven temperature program was initiated at 50 ºC for 1 min, followed by a ramp of 6 ºC/min to 200 ºC, and then further increased from 200 ºC to 270 ºC for 5 min at the same rate. Separation was achieved on a TG-5MS Zebron capillary column (30 m × 0.25 mm ID, 0.25 µm film thickness; Thermo). The injector temperature was set at 300 ºC, and a 1 µL sample was introduced in split mode with a split ratio of 20:1. Mass spectrometric detection was carried out using electron impact ionization (EI) at 70 electrons volts’ eV, with a scanning range of 50–600 m/z at a rate of five scans per second. Compound identification was performed using the NIST spectral library. Hexane was employed as the solvent.

- 1. **Total antioxidant capacity assay phosphomolybdenum reduction potential (PRP) method**

Total antioxidant capacity of WGO was monitored according to the method described by **Prieto *et al.* (1999)** ammonium molybdate was reduced into an oxide known as the kegging ion under acidic condition. Then the kegging ion was reduced by antioxidants of sample (WGO) to form greenish-blue colored complex. The reduction can be observed by formation of green phosphate molybdenum (V) complex at acidic pH.

**Preparations**

**Standard, sample:** vitamin E, WGO serial dilution (1,5,10, 15 and 20 %) were dissolved in methanol.

**Phosphomolybdenum reagent**: sulfuric acid H2SO4, 0.6 M; 94 mL distilled H2O+ 6 mL of conc.H2SO4.

**Sodium dihydrogen phosphate:** NaH2PO4, 28 mM

**Ammonium orthomolybdate:** (NH4)2MoO4, 4 mM

**0.43 g NaH2PO4** and **0.078 g (NH4)2MoO4**: in 100 mL diluted H2SO4.

**Procedure**

About 1.9 mL of prepared phosphomolybdenum reagent was added and mixed well by vortex with an aliquot (100 μL**)** of oil / standard (vitamin E). In oil blank tubes were prepared in a similar manner replacing phosphomolybdenum reagent by methanol. All mixture tubes were capped and incubated in a boiling water bath at 95 ℃ for 90 min (the test was carried out triplicate in each mixture using Wassermann tubes). Immediately, the absorbance of greenish-blue complex was measured at 695 nm using uv/vis spectrophotometer.

**Calculation**

Total antioxidant capacity of WGO was calculated using the standard curve of vitamin E. using linear regression equation (y= ax+b), then total antioxidant capacity was estimated from the following formula:

**Total antioxidant capacity of WGO (%) = [(AS- ASB)-b] / a**

Where;

AS: The mean absorbance of oil.

ASB: The mean absorbance oil blank.

a: The slope of vitamin E standard curve.

b: The intercept of vitamin E standard curve.

- 1. **Fabrication and physicochemical analysis of NLC loaded with wheat germ oil**

Nanostructured lipid carrier loaded with WGO was prepared by hot high shear homogenization method using High-shear homogenizer with different ratios of oily phase and different homogenization time. Initially, cetyl alcohol and Span 80 were co-melted at 60°C to achieve a homogenous oily phase, into which WGO was subsequently incorporated. Concurrently, an aqueous solution containing Cremophor RH40 was prepared and heated to an identical temperature. The heated aqueous phase was then progressively titrated into the oily phase under high-speed homogenization, commencing at 5,000 rpm and sustained at 60°C, followed by an intensified homogenization at 10,000 rpm for 10 minutes. Subsequent refinement of the selected formulation's dispersion was accomplished via ultra-sonication for 5 minutes, employing a pulsed 20/5 on/off cycle. To confer mucoadhesive characteristics upon the chosen formulation, chitosan, a widely recognized mucoadhesive polymer, was incorporated. A 0.5% chitosan dispersion was prepared by dissolving the polymer in 1% acetic acid with continuous magnetic stirring until complete solubilization. For the selected formulations (F6, F7), surface functionalization of the NLCs was achieved by blending 8 mL of the NLC dispersion with 2 mL of the chitosan solution via magnetic stirring for 30 minutes, followed by ambient cooling. A placebo formulation was prepared identically but without the inclusion of WGO.

- - 1. **Particle size analysis and polydispersity index (PDI)**

Particle size and PDI index of the prepared formulations were measured by dynamic light scattering using (Malvern Zeta Sizer Nano-ZS; UK). Samples were diluted 1:200 v/v with deionized water and bath sonicated for 10 min before measurements. The size and zeta tests were run in triplicates and results were represented as mean value ± standard deviation (SD).

- - 1. **Entrapment efficiency (EE%)**

The entrapment efficiency (EE%) was quantified using an indirect method, adapted. Briefly, 5 mL aliquots of the formulation were introduced into the upper chamber of Vivaspin 6™ ultrafiltration tubes (MWCO 100,000). Subsequent centrifugation was performed at 6,000 rpm for 1 hour at ambient temperature using a FINSEN-R high-speed centrifuge. An aliquot of the resulting filtrate was then subjected to UV-Visible spectrophotometry (Pg model T80+) to ascertain the concentration of unentrapped oil within the formulations. All measurements were conducted in triplicate and are expressed as mean ± standard deviation. The EE% was calculated utilizing the following equation:

where WT represents the total amount of oil added to the NLCs and WF the amount of free, unentrapped oil.

- - 1. **Morphological analysis TEM**

The morphology of the selected WGO-loaded NLCs was characterized using Transmission Electron Microscopy (TEM, Jeol JEM-1400 Plus, USA), (Faculty of Science, Alexandria University, Egypt). Samples were initially diluted 50-fold with deionized water and briefly sonicated in a bath for 5 minutes. A single drop of the NLC dispersion was then applied to a carbon-coated copper grid and allowed to air dry, forming a thin film. Subsequently, a drop of 2% phosphotungstic acid was added to the film to enhance particle contrast, followed by a 10-minute drying period prior to observation. Images were captured at 40,000× magnification with an acceleration voltage of 120 kV.

**Figure 1:** Standard curve of vitamin E

**Figure 2: Standard curve of AST**

**Figure 3: Standard curve of ALT**

**Figure 4: Standard curve of formaldehyde**

**Figure 5: Graph of p-aminophenol**

- 1. **Determination of DNA breakages with diphenylamine reaction in the tissues homogenate of male rats**

The diphenylamine DNA fragmentation percentage assay is a very useful method for measuring apoptosis by determining the percentage of fragmentation of DNA into oligosomal-sized fragments. The measure of soluble DNA released from apoptotic nuclei into the cytoplasm constitutes a quantitative measure of cellular response. Another advantage of the diphenylamine assay is that apoptotic DNA fragmentation can be analyzed in both adherent and floating cells following treatment with chemotherapeutic or other agents. Data obtained from the experiment are expressed as a percentage relative to uninduced or untreated controls. DNA fragmentation% assay. The tissue (50 mg) was homogenized in 10 volumes of a TE solution pH 8.0 (5 mmol/L Tris–HCl, 20 mmol/L EDTA) and 0.2% triton X-100. 1.0 ml aliquot of each sample was centrifuged at 27,000 rpm for 20 min to separate the intact chromatin (pellet, B) from the fragmented DNA (supernatant, T). The pellet and supernatant fractions were assayed for DNA content using a freshly prepared DPA (Diphenylamine) solution for reaction. Optical density was read using spectrophotometry at 620 nm. The results were expressed as the percentage of % fragmented DNA by the following formula:

Fragmented DNA (%) = T X 100/ (T + B)

T: Measure absorbance of Supernatant

B: Measure the absorbance of the pellet

- 1. **Determination of catalase activity in the tissues homogenate of male rats**

The test principle is based on dichromate in acetic acid is reduced to chromic acetate when heated in the presence of hydrogen peroxide (H2O2), with the formation of blue perchromic acid as an unstable intermediate.

**Cr2O7–2+ 7H2O2 → 2CrO8–3 + 5H2O + 4H+**

Hydrogen peroxide concentration is directly proportional to the concentration of chromic acetate that produced from the reaction

**2CrO8–3+ 6CH3COO– + 6H+→ 2Cr (CH3COO)3+ 14 H2O**

The chromic acetate produced can be measured calorimetrically. Samples were added to two tubes serving as test and control test, 100μL of sample in each, and another two tubes serving as standard and blank. 100μL of distilled water was added to the standard tube and 100μL to the blank tube. To test and standardize tubes, add 1000μL of H2O2 substrate solution consisting of 65 mmol/L in 50 mmol/L sodium, potassium phosphate buffer pH 7.4, containing 0.1% w/v bovine serum albumin; the solution is freshly diluted and standardized daily using a molar extinction coefficient of 39.4 mol-1 cm-1 at 240 nm. All four tubes were mixed with vortex and incubated at 37 °C for 3 min; after that, 2000μL of dichromate/acetic acid reagent was added. This reagent is prepared by mixing 50 mL of a 5% aqueous solution of potassium dichromate with 150 mL of glacial acetic acid. The tubes were kept at 100 °C for 10 min. After cooling with tap water, all tubes were centrifuged to remove precipitated protein (2500 rpm for 5 min), and the changes in absorbance of the supernatant were recorded at 570 nm against the reagent blank. The following equation was used for calculating the enzyme activity:

**Catalase Activity IU/ g tissue = 2.303/t {log S°/S-M} * Vt/ Vs**

**t: time**

**Sº: Absorbance of standard tube**

**S: Absorbance of the test tube**

**M: Absorbance of control test (correction factor)**

**Vt: Total volume of reagents in the test tube**

**Vs: Volume of sample**

- 1. **Determination of Titanium content in tissue by using inductively coupled plasma**

All measurements were carried out with an inductively coupled plasma (ICP-ES Agilent 5100 VDV) instrument. ICP atomic emission Spectroscopy is a recent analytical technique used to measure and analysis of trace metals within a sample matrix with high accuracy and precision and low detection limit starting from ppb level to high concentration of ppm, it is a type of emission spectroscopy that uses the inductively coupled plasma to produce excited atoms and ions that emit electromagnetic radiation at wavelength characteristic of a particular element. It is a flame technique with a flame temperature in a range from 8000 to 10000 k. the intensity of this emission is proportional of the concentration of the element within the sample. ICP analysis requires the use of liquefied sample solutions, so solid samples and biological samples are often digested prior to analysis. Metals analysis quality control was carried out according to standard methods US EPA Method 200.7 and US EPA Method 6010 C.

- - 1. **Digestion of Organ tissues**

Whole organs were immediately isolated, lyophilized for 72 h, and individually stored in high-pressure Teflon containers tissues at ≤18 °C until analysis. Each tissue sample approximately (250- 500) mg were accurately weighed, using a Precise instrument (LAB254i Adam U.K) balance, then pre-digested overnight at room temperature in digesting solution (5ml nitric acid ultrapure grade, Carlo Erba, Rodano, Italy) and (1 mL H2O2 ultrapure grade, Merck, Darmstadt, Germany) and brought into a perfluoroalkoxy (PFA) microwave digestion tube (Sarstedt BV, Etten-Leur, The Netherlands) then added to the microwave digestion vessels and digested by following the microwave program: MW(w) 1800 and temperature 210°C for 25 min. In start the color of fumes was yellow. The digestion process was continued till the fumes became colorless. The digests were filtered and transferred to pre-cleaned volumetric flask and completed to a volume of 10 mL with double-distilled water. The mass of the measured tissue and its dilution were taken into consideration when converting raw data (mg/L) to 𝜇g of Ti/g of tissue.

- - 1. **Calibration and quality control**

Four-point external calibration curves from 0 to 20 μg/ L Ti were constructed every five working hours. Regression coefficients obtained were always excellent (r 2 ranged from 0.9996 to 1.0000). Every 12 samples, a blank and a Ti ICP standard of the calibration curve (2.5 μg/L Ti) were measured to check for memory effects and correct for likely signal drift. In addition, two selected Ti-containing biological reference materials were also measured every 12 samples as a quality control (if each reference material result was not within the confidence interval of the reference value the whole group analysis was repeated).

**Figure 6: Calibration curve of titanium nanoparticles**

- 1. **Immunohistochemically studies**

TNF-α, and GP88 proteins were carried out using an immunohistochemistry protocol of the Striptoavidin Biotin Complex (SABC) (A universal kit (SABC – HRP) reagent and DAB stain) from Thermo Fisher – USA). The formalin-fixed paraffin sections (FFPE) were cut 5 µm-thick, placed on coated glass slides, and processed for immunostaining. The slides were deparaffinized, rehydrated, and rinsed in distilled water. Slides were placed in a large amount of antigen retrieval (citrate buffer pH 6) in an oven at 95 °C for 20 minutes. Then washed in phosphate buffer saline (PBS) twice, 5 minutes each. Endogenous peroxide activity was quenched using 3.0% H2O2 in PBS. The slides were washed in PBS twice, 5 minutes each. The incubated with serum blocking reagent for 30 minutes and washed in PBS twice, 5 minutes each, then incubated with primary antibodies of TNF-α and GP88 overnight at 4°C in a humidified chamber. Negative control slides were incubated without adding the primary antibody. On the 2nd day, the slides were allowed to reach the room temperature and then washed in PBS twice, 5 minutes each, and incubated with conjugated SABC-HRP reagent for 30 minutes in a humidified chamber at room temperature, then washed in PBS twice, 5 minutes each. The slides were stained with chromogen DAB, and the chromomeric reaction turned the epitome sites brown. The slides were rinsed in distilled water, stained with hematoxylin as a nuclear counterstain, and then rinsed in running tap water. Finally, Sections were dehydrated, cleared, and mounted. The (TNF-α, GP88) expression is indicated by dark brown stain labeling the tissue, and the blue color indicates the negative reaction. The semi-quantitative evaluation of the immunohistochemically results of both primary antibodies was done according to the intensity of stain (+1 weak, +2 moderate, +3 strong, +4 intense).
